# Supplementary material
Source: publisher figshare collection journal article supplement (https://geolsoc.figshare.com/articles/dataset/_/3453467)
Supplement: Supplementary file 2 [file 1]

Vincent *et al.* Supplementary Material. Table 3. Petrographic data table key.

| Grain size    | Grain shape     | Grain sorting      | Grain contacts/<br>packing | Pore types                     | Pore interconnectivity &<br>Visual reservoir potential | Outcrop category                 | Exploration risk |
|---------------|-----------------|--------------------|----------------------------|--------------------------------|--------------------------------------------------------|----------------------------------|------------------|
|               |                 |                    |                            |                                |                                                        | (see Tobin, 1997)                |                  |
| mU 350-500 μm | wr well rounded | g good             | F floating                 | PBG primary intergranular      | E excellent                                            | 1 tight depositional facies      | L low            |
| mL 250-350 μm | r rounded       | mg moderately good | P point                    | PWG primary intragranular      | G good                                                 | 2 uncertain depositional facies  | M moderate       |
| fU 177-250 μm | sr subrounded   | m moderate         | L long                     | SBG secondary intergranular    | M moderate                                             | 3 recent pore destruction        | H high           |
| fL 125-177 μm | sa subangular   | p poor             | C concavo-convex           | SWG secondary intragranular    | P poor                                                 | 4 dominantly compacted           | U unknown        |
| vfU 88-125 μm | a angular       |                    | S sutured                  | SBC secondary intercrystalline | N negligible                                           | 5 early near-surface compacted   |                  |
| vfL 62-88 μm  |                 |                    |                            | SWC secondary intracrystalline |                                                        | 6 late burial cemented           |                  |
| silt 4-62 μm  |                 |                    |                            | F fracture                     |                                                        | 7 recent weathering minimal      |                  |
| clay <4 μm    | <b>Porosity</b> |                    | <b>Data</b>                |                                |                                                        | 8 weathered; depositional fabric |                  |
|               | P porous        | - not available    |                            |                                |                                                        | 9 weathered; depositional fabric |                  |
|               | T tight         |                    |                            |                                |                                                        | 10 recent weathering uncertain   |                  |
