# Supplementary material
Source: publisher figshare collection journal article supplement (https://geolsoc.figshare.com/articles/dataset/_/3453467)
Supplement: Supplementary file 3 [file 1]

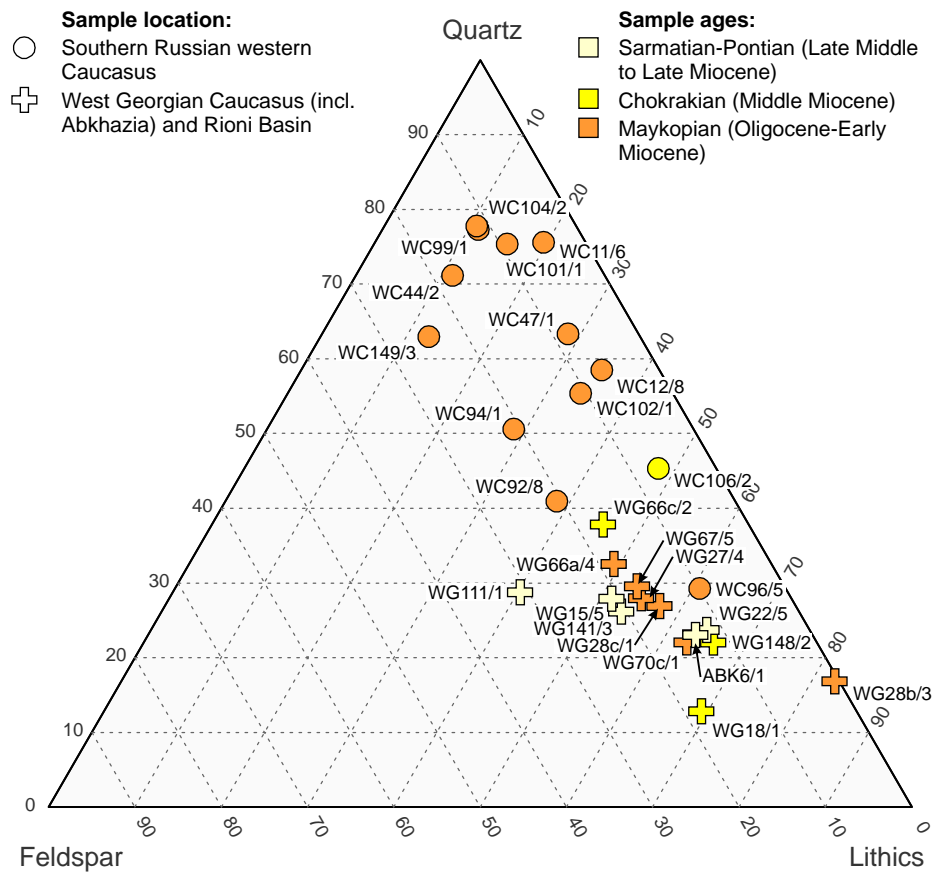

Vincent *et al.* Supplementary Material. Figure 1. Quartz-Feldspar-Lithics (QFL) plot of Oligo-Miocene samples derived from the western Caucasus on the southern side of the range.
