# Supplementary material
Source: publisher figshare collection journal article supplement (https://geolsoc.figshare.com/articles/dataset/_/3453467)

Vincent et al. Supplementary Material. Figure 2. Stratabugs™ chart for palynological samples from the Mzimta River section between 43°30' 34.2"N 40° 1' 36.6"E - 43°26' 07.8"N 39° 59' 36.0"E in the Russian western Caucasus.

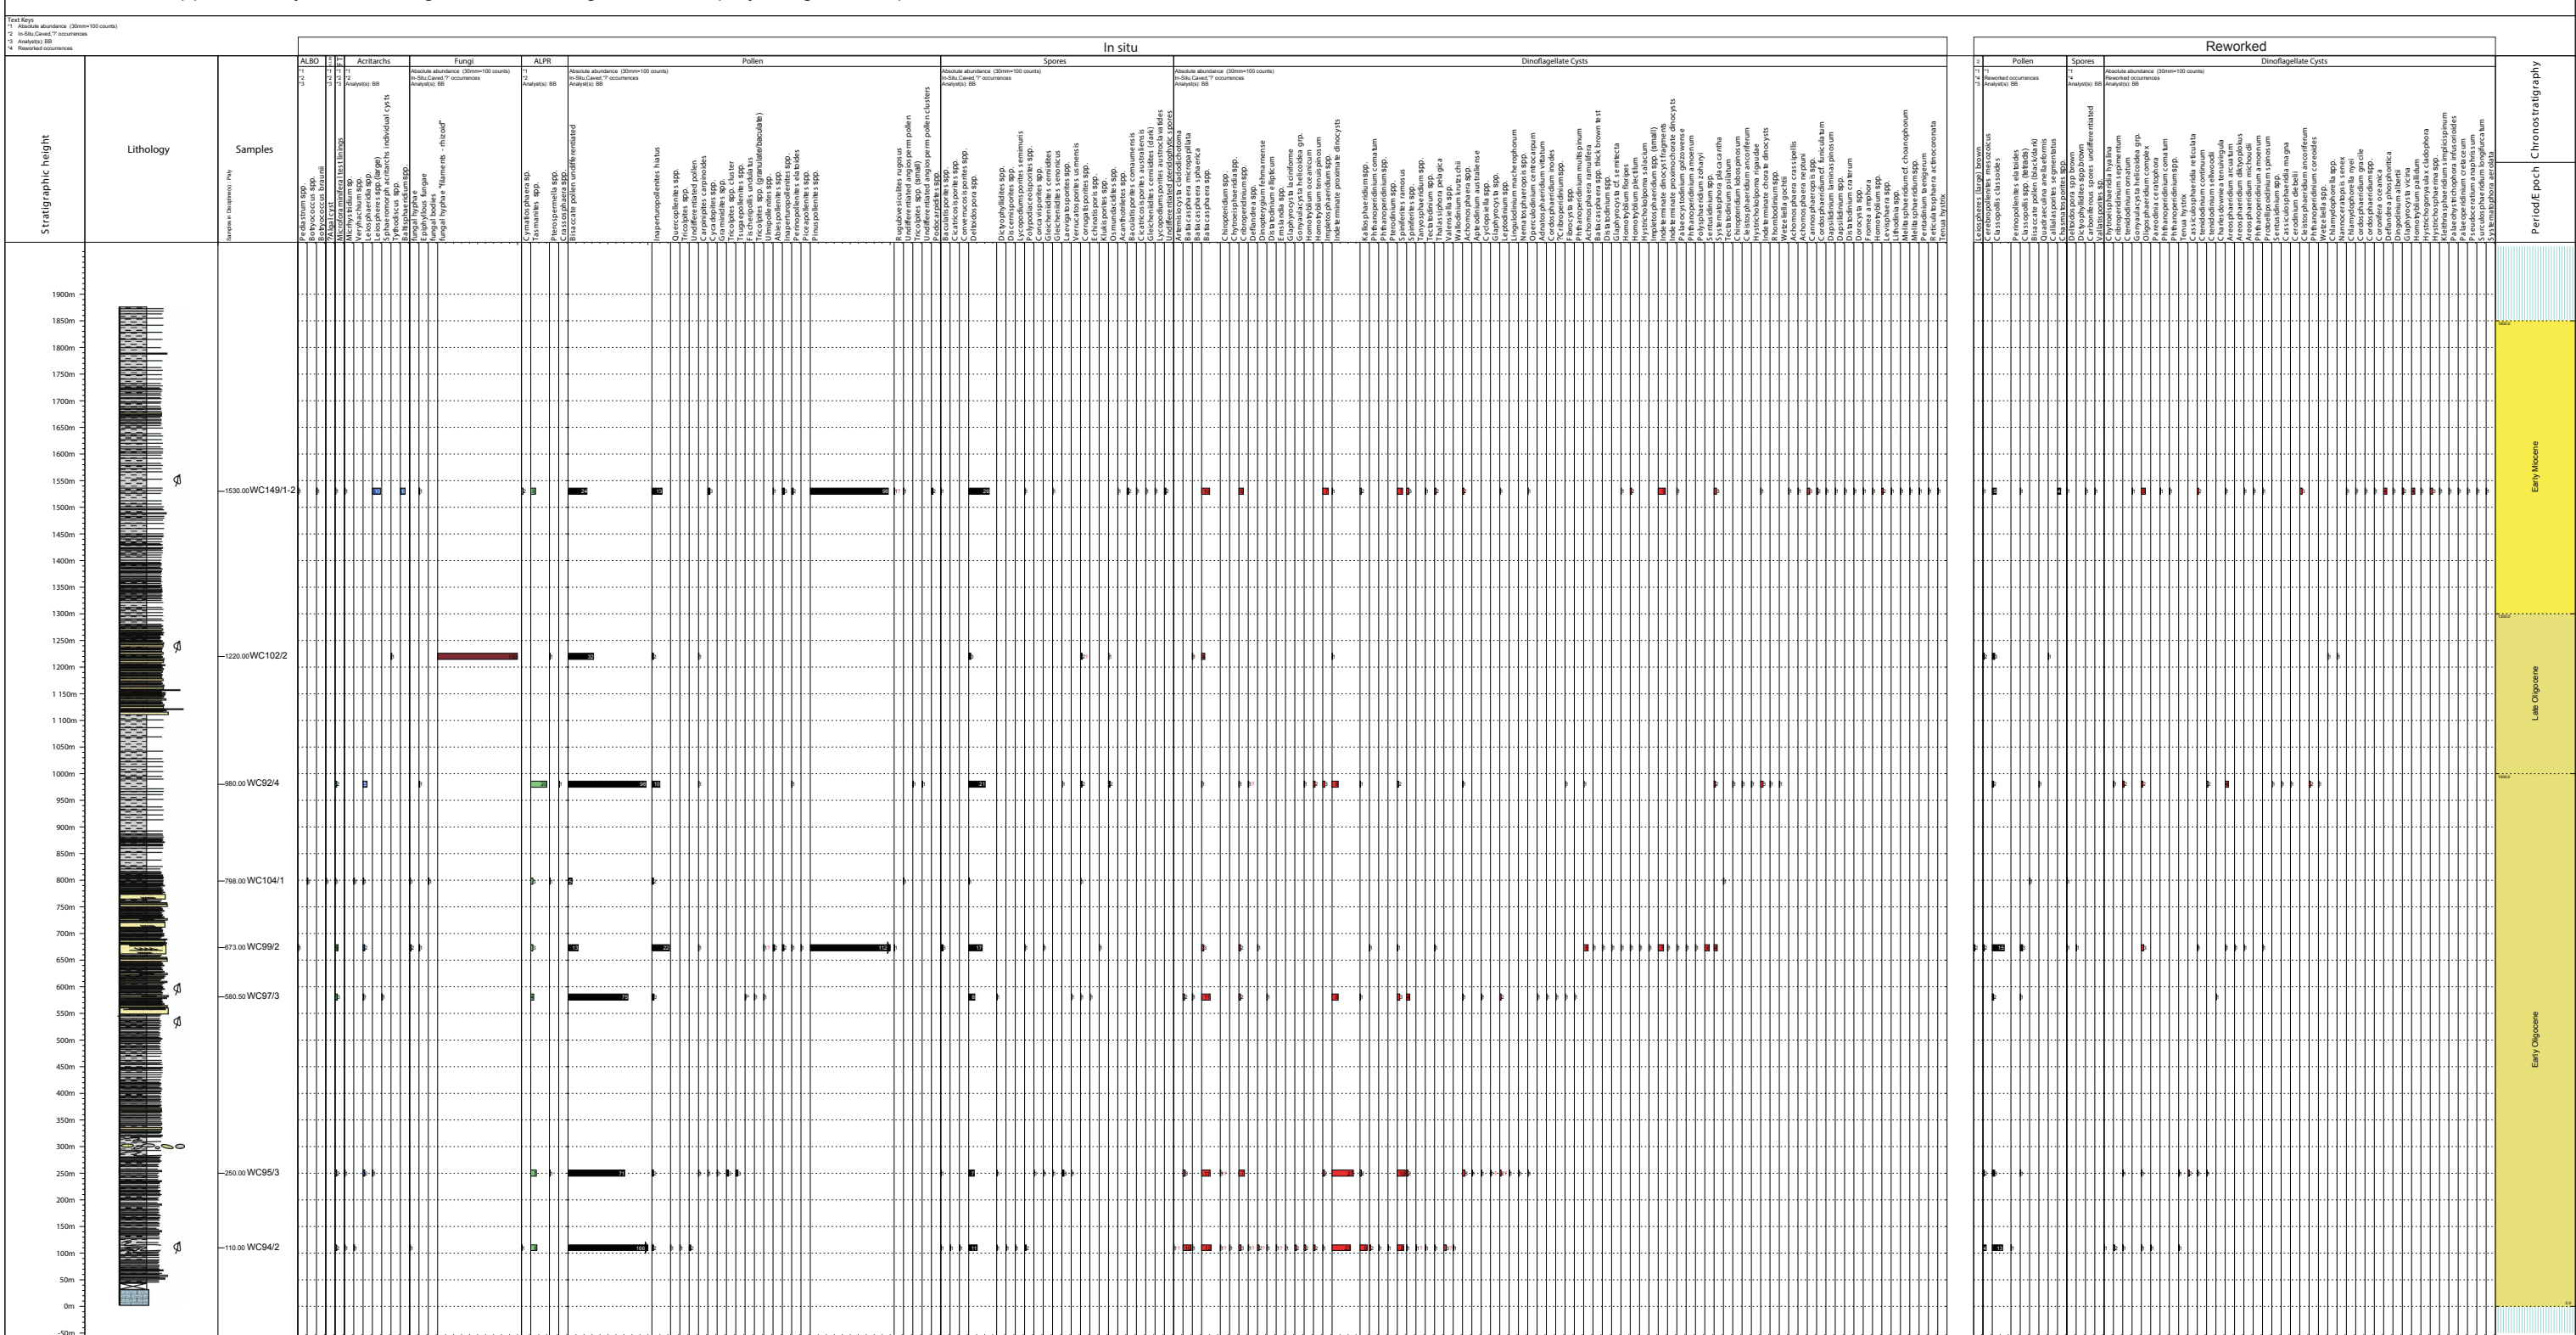

Supplement: Supplementary file 4 [file 1]
