# Supplementary material
Source: publisher figshare collection journal article supplement (https://geolsoc.figshare.com/articles/dataset/_/3453467)
Supplement: Supplementary file 5 [file 1]

Vincent *et al.* Supplementary Material. Table 1. Sample data table.

| Sample number | Mzimta log height (m) | Chanis log height (m) | GPS Position           | Geographic region        | Stratigraphic age (Paratethyan stage)     | Rock type                                    |
|---------------|-----------------------|-----------------------|------------------------|--------------------------|-------------------------------------------|----------------------------------------------|
| ABK6/1        |                       |                       | ~42°52'N, 41°39'E      | Abkhazia                 | Late Messinian (Pontian)                  | Lithic arenite                               |
| WC11/6        |                       |                       | 43°34.86'N, 40°00.31'E | Russian western Caucasus | Rupelian (Maykopian)                      | Sublitharenite                               |
| WC12/8        |                       |                       | 43°32.14'N, 39°59.99'E | Russian western Caucasus | Rupelian (Maykopian)                      | Lithic arenite                               |
| WC44/2        | 744                   |                       | 43°28.55'N, 39°58.90'E | Russian western Caucasus | Rupelian (Maykopian)                      | Sublitharenite                               |
| WC47/1        |                       |                       | 43°31.27'N, 39°52.56'E | Russian western Caucasus | Rupelian (Maykopian)                      | Lithic arenite                               |
| WC92/4        | 980                   |                       | 43°35.95'N, 39°45.28'E | Russian western Caucasus | Late Rupelian (Maykopian)                 | Mudstone                                     |
| WC92/8        | 995                   |                       | 43°35.95'N, 39°45.28'E | Russian western Caucasus | Late Rupelian (Maykopian)                 | Lithic arenite                               |
| WC94/1        | 108                   |                       | 43°30.40'N, 40°01.55'E | Russian western Caucasus | Early Rupelian (Maykopian)                | Lithic arenite                               |
| WC94/2        | 110                   |                       | 43°30.40'N, 40°01.55'E | Russian western Caucasus | Early Rupelian (Maykopian)                | Mudstone                                     |
| WC95/3        | 250                   |                       | 43°30.17'N, 40°01.56'E | Russian western Caucasus | Rupelian (Maykopian)                      | Mudstone                                     |
| WC96/5        | 547                   |                       | 43°29.74'N, 40°01.49'E | Russian western Caucasus | Rupelian (Maykopian)                      | Lithic arenite                               |
| WC97/3        | 580.5                 |                       | 43°29.18'N, 40°01.83'E | Russian western Caucasus | Rupelian (Maykopian)                      | Mudstone                                     |
| WC99/1        | 657                   |                       | 43°28.52'N, 40°01.88'E | Russian western Caucasus | Mid Rupelian (Maykopian)                  | Sublitharenite                               |
| WC99/2        | 673                   |                       | 43°28.52'N, 40°01.88'E | Russian western Caucasus | Mid Rupelian (Maykopian)                  | Mudstone                                     |
| WC101/1       | 760                   |                       | 43°27.51'N, 40°01.59'E | Russian western Caucasus | Rupelian (Maykopian)                      | Sublitharenite                               |
| WC102/1       | 1219                  |                       | 43°27.05'N, 39°56.87'E | Russian western Caucasus | ?Chattian (Maykopian)                     | Lithic arenite                               |
| WC102/2       | 1220                  |                       | 43°27.05'N, 39°56.87'E | Russian western Caucasus | ?Chattian (Maykopian)                     | Mudstone                                     |
| WC104/1       | 798                   |                       | 43°27.72'N, 39°57.50'E | Russian western Caucasus | Rupelian (Maykopian)                      | Mudstone                                     |
| WC104/2       | 797                   |                       | 43°27.72'N, 39°57.50'E | Russian western Caucasus | Rupelian (Maykopian)                      | Sublitharenite                               |
| WC106/2       |                       |                       | 43°25.86'N, 39°58.95'E | Russian western Caucasus | Langhian-Serravalian (Chokrakian-Konkian) | Lithic arenite                               |
| WC149/1-2     | 1530                  |                       | 43°31.12'N, 39°51.06'E | Russian western Caucasus | Aquitanian-Burdigalian (Maykopian)        | Mudstone                                     |
| WC149/3       | 1531                  |                       | 43°31.12'N, 39°51.06'E | Russian western Caucasus | Aquitanian-Burdigalian (Maykopian)        | Subarkose                                    |
| WG15/5        |                       |                       | 42°16.35'N, 42°01.28'E | West Georgia             | Tortonian-Messinian (Meotian)             | Lithic arenite                               |
| WG18/1        |                       |                       | 42°19.56'N, 42°04.30'E | West Georgia             | Serravalian (Karaganian)                  | Interlaminated lithic arenite & lithic wacke |
| WG22/5        |                       |                       | 42°40.48'N, 42°05.36'E | West Georgia             | Tortonian (Middle Sarmatian)              | Lithic arenite                               |
| WG25/6        |                       | 138                   | 42°39.52'N, 42°09.39'E | West Georgia             | Rupelian (Maykopian)                      | Mudstone                                     |
| WG27/4        |                       | 1061                  | 42°39.76'N, 42°08.00'E | West Georgia             | Aquitanian-Burdigalian (Maykopian)        | Lithic arenite                               |
| WG28/1        |                       | 555                   | 42°40.02'N, 42°08.17'E | West Georgia             | Late Chattian (Maykopian)                 | Mudstone                                     |
| WG28b/3       |                       | 653                   | 42°39.95'N, 42°08.15'E | West Georgia             | Late Chattian (Maykopian)                 | Lithic arenite                               |
| WG28c/1       |                       | 757                   | 42°39.91'N, 42°08.09'E | West Georgia             | Late Chattian (Maykopian)                 | Lithic arenite                               |
| WG28d/1       |                       | 744.5                 | 42°39.87'N, 42°08.21'E | West Georgia             | Late Chattian (Maykopian)                 | Mudstone                                     |
| WG28e/1       |                       | 333.5                 | 42°40.04'N, 42°08.37'E | West Georgia             | Chattian (Maykopian)                      | Mudstone                                     |
| WG66a/4       |                       |                       | 42°37.51'N, 42°43.84'E | West Georgia             | Langhian (Tarkhanian)                     | Lithic arenite                               |
| WG66c/2       |                       |                       | 42°37.69'N, 42°43.70'E | West Georgia             | Langhian (Chokrakian)                     | Lithic arenite                               |
| WG67/5        |                       |                       | 42°35.79'N, 42°42.46'E | West Georgia             | Burdigalian (Maykopian)                   | Lithic arenite                               |
| WG70c/1       |                       |                       | 42°37.10'N, 42°43.03'E | West Georgia             | Burdigalian (Maykopian)                   | Lithic arenite                               |
| WG111/1       |                       |                       | 42°06.57'N, 42°51.85'E | West Georgia             | Serravalian-Tortonian (Early Sarmatian)   | Lithic arenite                               |
| WG125/2       |                       | 1085                  | 42°39.68'N, 42°07.93'E | West Georgia             | Burdigalian (Maykopian)                   | Mudstone                                     |
| WG126/2       |                       | 1280                  | 42°39.71'N, 42°07.71'E | West Georgia             | Burdigalian (Maykopian)                   | Mudstone                                     |
| WG141/3       |                       |                       | 42°34.86'N, 42°57.94'E | West Georgia             | Tortonian (Middle Sarmatian)              | Lithic arenite                               |
| WG147/1       |                       | 1430                  | 42°39.57'N, 42°07.61'E | West Georgia             | Burdigalian (Maykopian)                   | Mudstone                                     |
| WG148/2       |                       | 1603                  | 42°39.32'N, 42°07.52'E | West Georgia             | Langhian (Tarkhanian-Chokrakian)          | Lithic arenite                               |
